# Supplementary material for: Diffuse myocardial fibrosis associates with incident ventricular arrhythmia in implantable cardioverter defibrillator recipients
Source: PubMed Central journal article supplement (PMC9949189; doi:10.1101/2023.02.15.23285925), 2023-02-16
Supplement: NIHPP2023.02.15.23285925v1-supplement-1.pdf [file NIHPP2023.02.15.23285925v1-supplement-1.pdf]

**Supplemental Figure.** Native T1 categories did not associate with incident ICD shock (n=25, panel A) but did associate with the composite endpoint of ICD shock or ATP therapy (n=44, panel B) in 215 ICD recipients. These outcomes associations were not as robust compared to those of ECV in head to head univariable Cox regression model comparisons or in multivariable Cox regression models.

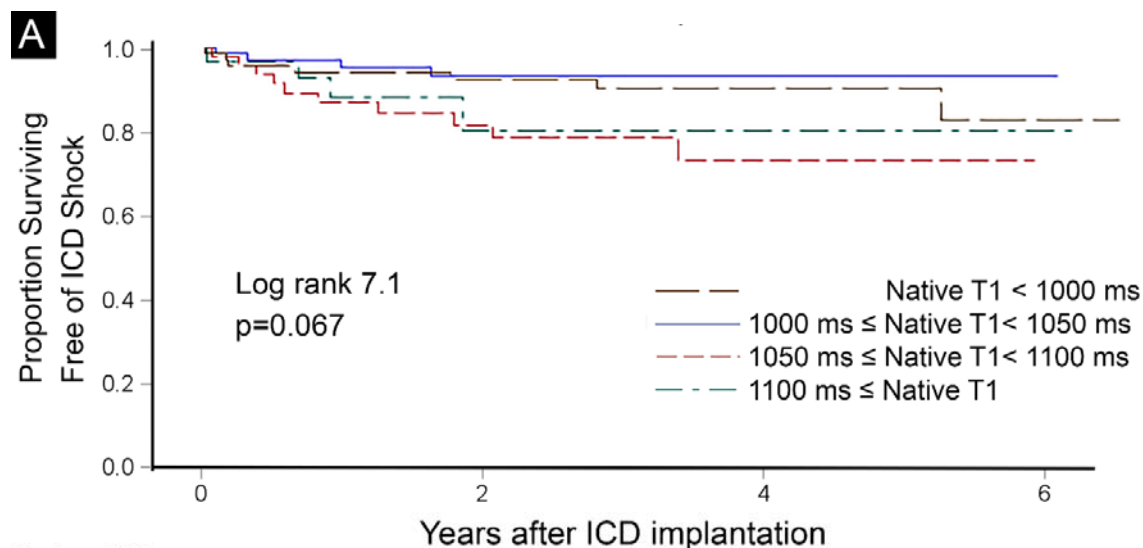

| Number at Risk   |    |    |    |    |    |    |
|------------------|----|----|----|----|----|----|
| T1<1000ms        | 68 | 57 | 48 | 39 | 31 | 13 |
| 1000ms≤T1<1050ms | 71 | 52 | 42 | 28 | 14 | 4  |
| 1050ms≤T1<1100ms | 47 | 35 | 26 | 16 | 8  | 4  |
| 1100ms≤T1        | 29 | 17 | 9  | 7  | 2  | 1  |

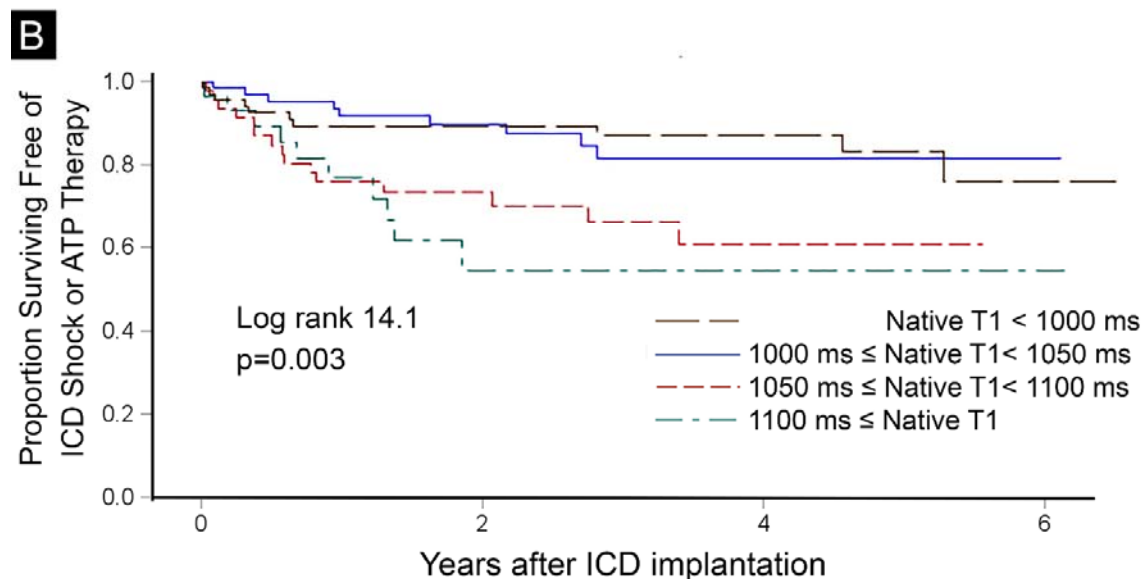

| Number at Risk   |    |    |    |    |    |    |
|------------------|----|----|----|----|----|----|
| T1<1000ms        | 68 | 54 | 47 | 39 | 31 | 12 |
| 1000ms≤T1<1050ms | 71 | 50 | 40 | 24 | 12 | 3  |
| 1050ms≤T1<1100ms | 47 | 31 | 23 | 14 | 6  | 3  |
| 1100ms≤T1        | 29 | 15 | 8  | 6  | 2  | 1  |

**Supplemental Table. The overall prevalences of various LGE patterns in our cohort align with prevalences of various LGE patterns in prior reports.**

| <b>Paper</b>                                                                                                                                                                                                                                                                                                                                       | <b>Participants (n)</b> | <b>Any LGE prevalence</b> | <b>MI by LGE prevalence</b> | <b>Midwall LGE</b> |
|----------------------------------------------------------------------------------------------------------------------------------------------------------------------------------------------------------------------------------------------------------------------------------------------------------------------------------------------------|-------------------------|---------------------------|-----------------------------|--------------------|
| Gulati A, Jabbour A, Ismail TF et al. Association of fibrosis with mortality and sudden cardiac death in patients with nonischemic dilated cardiomyopathy. JAMA 2013;309:896-908.(15)                                                                                                                                                              | 472                     | -                         | -                           | 30%                |
| Pontone G, Guaricci AI, Andreini D et al. Prognostic Benefit of Cardiac Magnetic Resonance Over Transthoracic Echocardiography for the Assessment of Ischemic and Nonischemic Dilated Cardiomyopathy Patients Referred for the Evaluation of Primary Prevention Implantable Cardioverter-Defibrillator Therapy. Circ Cardiovasc Imaging 2016;9.(2) | 409                     | 60%                       | 52%                         | Not reported       |
| Gao P, Yee R, Gula L et al. Prediction of arrhythmic events in ischemic and dilated cardiomyopathy patients referred for implantable cardiac defibrillator: evaluation of multiple scar quantification measures for late gadolinium enhancement magnetic resonance imaging. Circ Cardiovasc Imaging 2012;5:448-56. (23)                            | 124                     | 85%                       | Not reported                | Not reported       |
| Klem I, Weinsaft JW, Bahnson TD et al. Assessment of myocardial scarring improves risk stratification in patients evaluated for cardiac defibrillator implantation. J Am Coll Cardiol 2012;60:408-20. (17)                                                                                                                                         | 137                     | 78%                       | Not reported                | Not reported       |
| Current manuscript: Olausson E, Wertz J, Fridman Y, et al. Diffuse myocardial fibrosis associates with incident ventricular arrhythmia in implantable cardioverter defibrillator recipients. JACC Cardiovasc Imaging 2020                                                                                                                          | <b>215</b>              | <b>73%</b>                | <b>46%</b>                  | <b>28%</b>         |
